# Supplementary figures and images for: Heg1 and Ccm1/2 proteins control endocardial mechanosensitivity during zebrafish valvulogenesis
Source: eLife journal article supplement (doi:10.7554/elife.28939), 2018-01-24

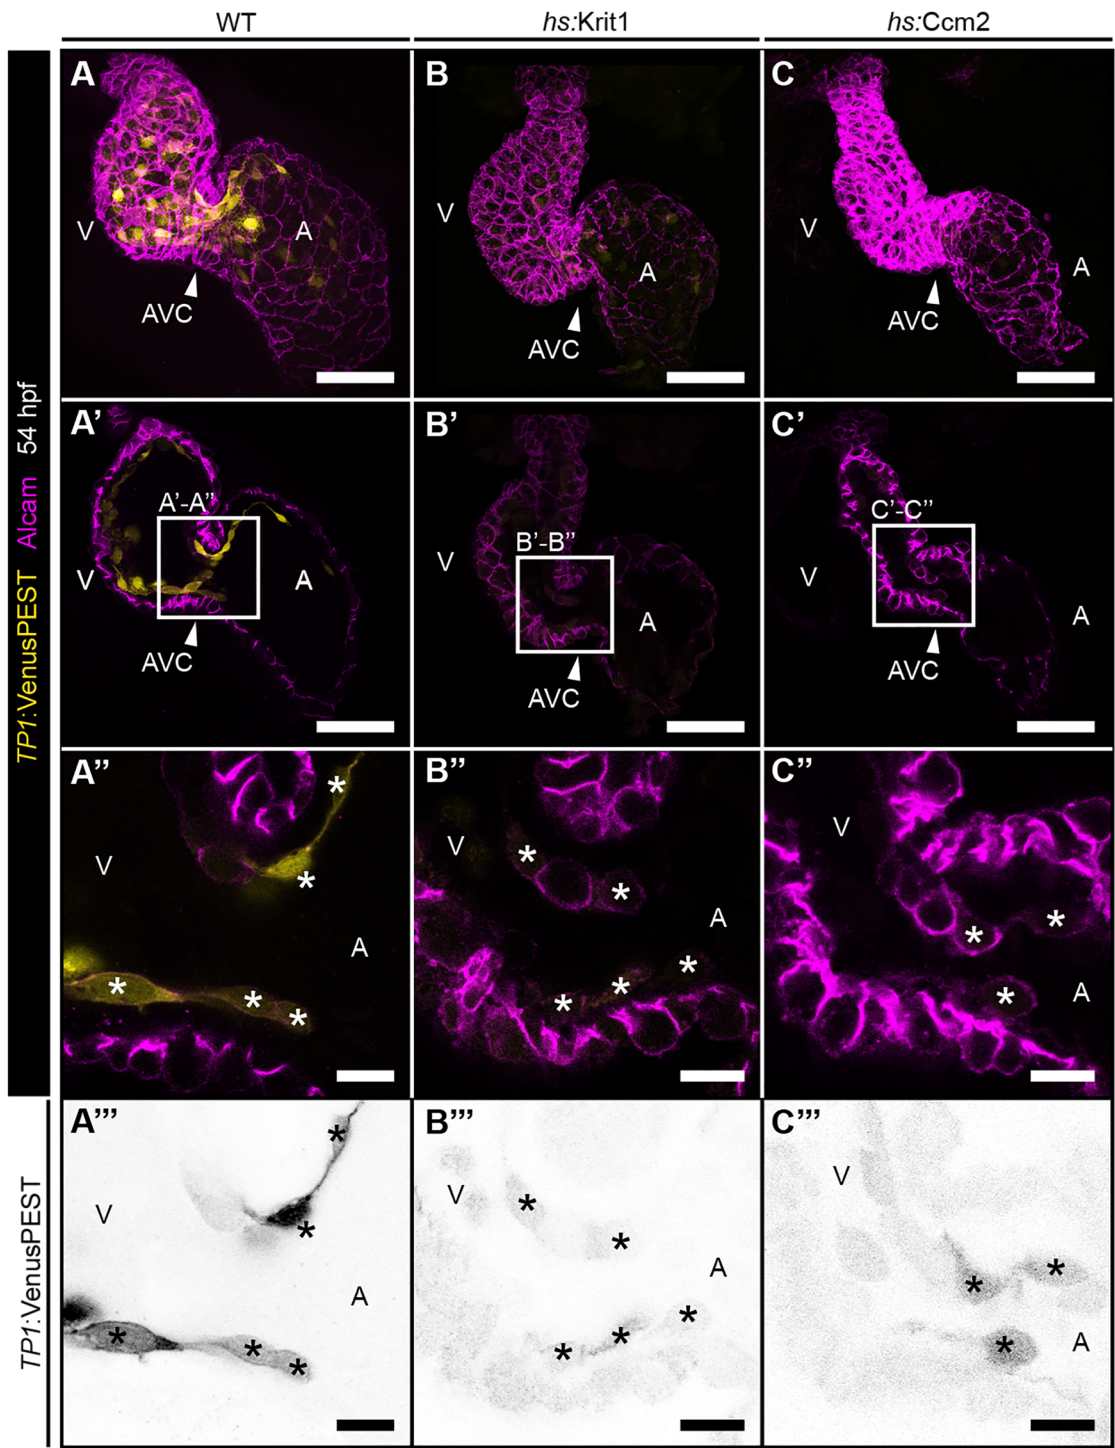

Figure 2-figure supplement 1

Supplement: supp [file elife-28939-supp-v1.zip]

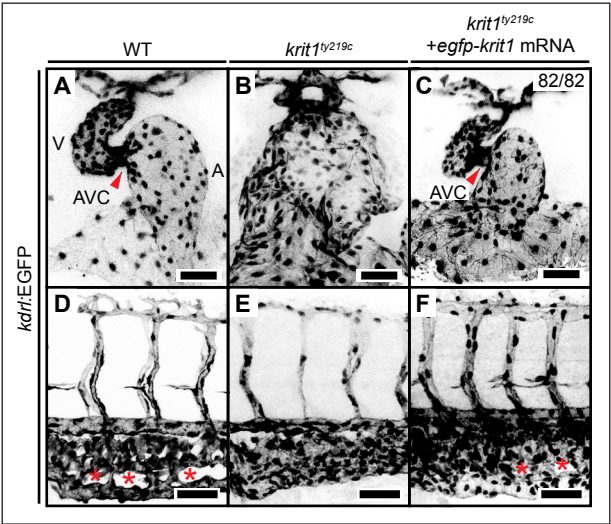

Figure 3-figure supplement 1

Supplement: supp [file elife-28939-supp-v1.zip]

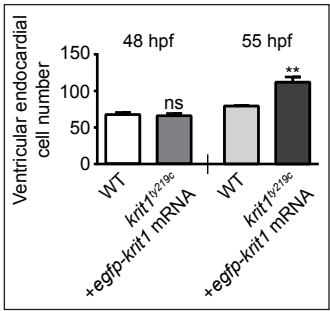

Figure 3-figure supplement 2

Supplement: supp [file elife-28939-supp-v1.zip]

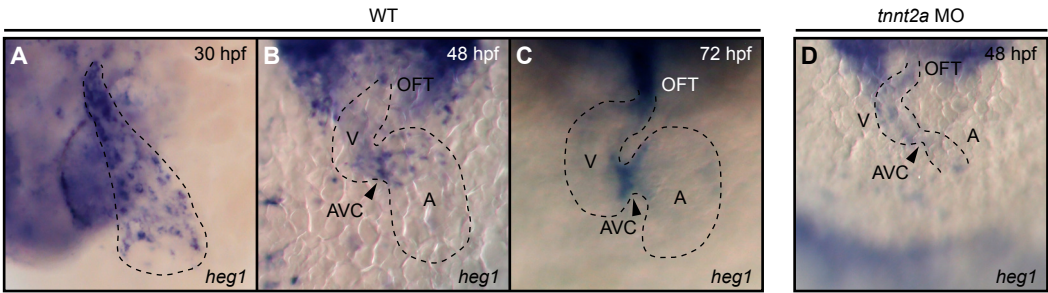

Figure 1-figure supplement 1

Supplement: supp [file elife-28939-supp-v1.zip]

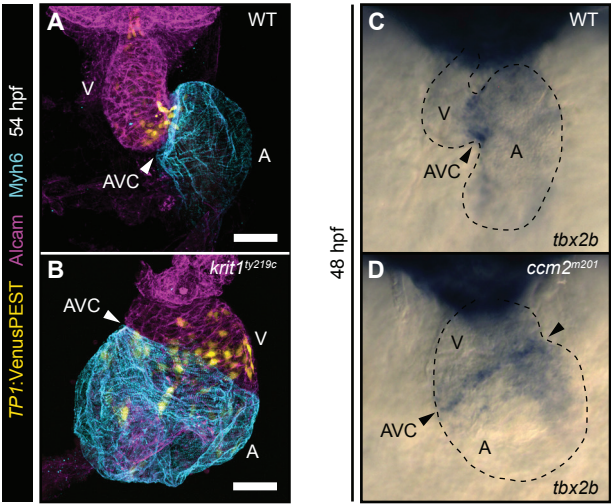

Figure 4-figure supplement 1

Supplement: supp [file elife-28939-supp-v1.zip]

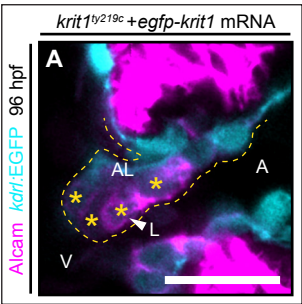

Figure 3-figure supplement 5

Supplement: supp [file elife-28939-supp-v1.zip]

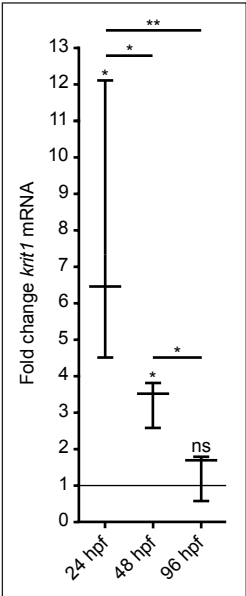

Figure 3-figure supplement 3

Supplement: supp [file elife-28939-supp-v1.zip]

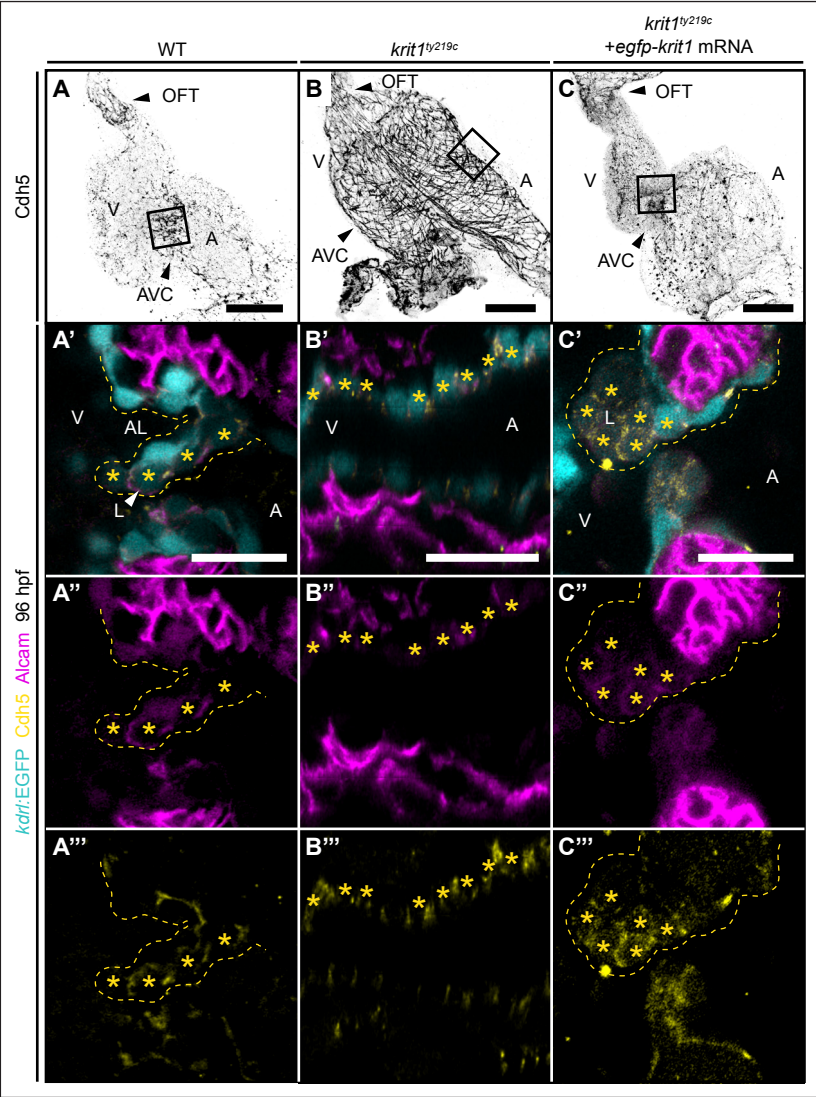

Figure 3-figure supplement 4

Supplement: supp [file elife-28939-supp-v1.zip]

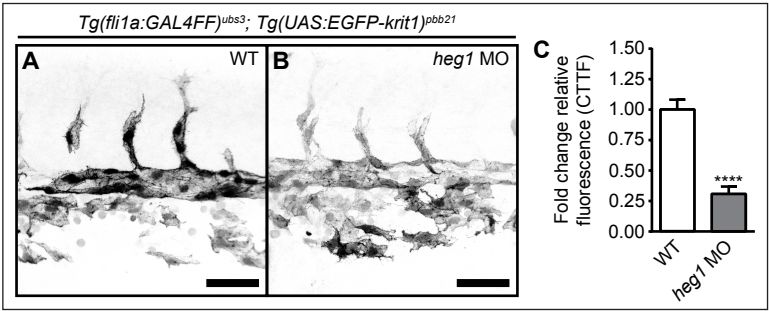

Figure 1-figure supplement 2

Supplement: supp [file elife-28939-supp-v1.zip]
